# Supplementary material for: Physician-Reported Perspectives on Myasthenia Gravis in the United States: A Real-World Survey
Source: Springer Nature journal article supplement (doi:10.1007/s40120-022-00383-3), 2022-07-20
Supplement: MOESM1 [file 23287664]

# **Physician-Reported Perspectives on Myasthenia Gravis in the United States: A Real-World Survey**

Milada Mahic<sup>1</sup>; Ali M. Bozorg<sup>2</sup>; Jonathan J. DeCourcy<sup>3</sup>; Keisha J. Golden<sup>3</sup>; Gregor A. Gibson<sup>3</sup>; Christian F. Taylor<sup>3</sup>; Angela Ting<sup>4</sup>; Tyler J. Story<sup>4</sup>; Anna Scowcroft<sup>1</sup>

<sup>1</sup>UCB Pharma, Slough, UK; <sup>2</sup>UCB Pharma, Morrisville, NC, US; <sup>3</sup>Adelphi Real World, Bollington, UK;

<sup>4</sup>UCB Inc, Atlanta, GA, US.

## **Corresponding author**

Anna Scowcroft, MSc

Email: [Anna.Scowcroft@ucb.com](mailto:Anna.Scowcroft@ucb.com)

**Supplementary Figure 1. The three main phases of a DSP**

DSPs can be split into three key phases: Preparatory phase, data collection phase, and data processing/analysis phase. Development of fieldwork materials takes place in the preparatory phase including research, programming, and translation. The data collection phase occurs next and fieldwork is collected from physicians (on both an attitudinal level and a patient level) and then matched, where possible, with patients providing voluntary self-completion forms (occasionally filled out by a caregiver when a patient is unavailable or incapable). After data collection, the data are processed and analyzed. Presentations and reports can begin during the data processing/analysis phase.

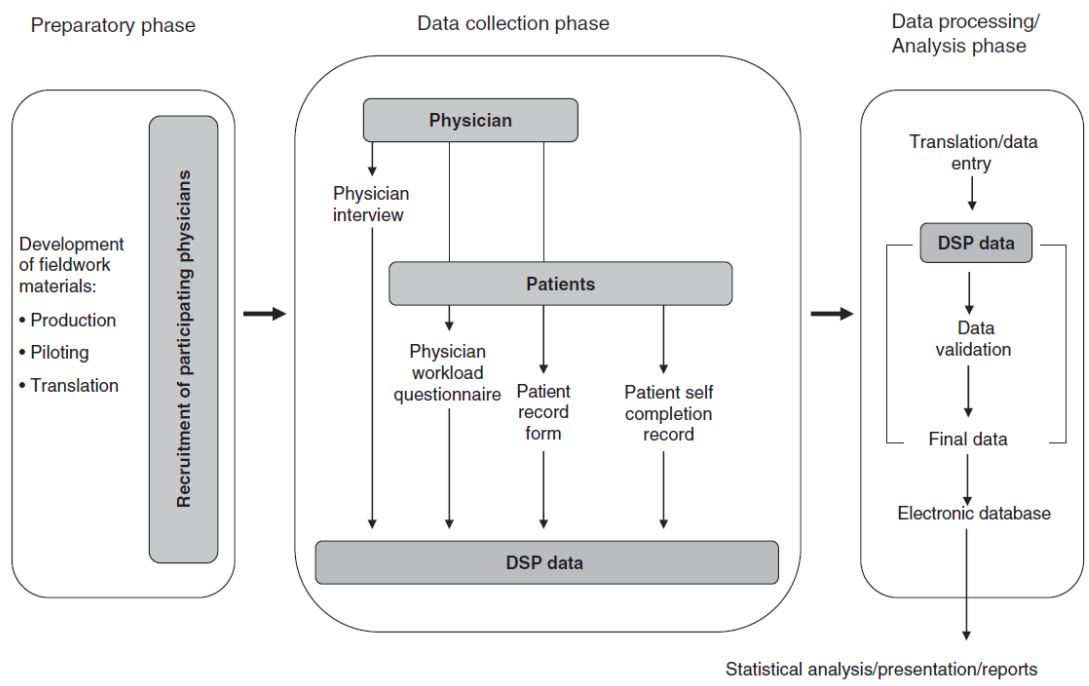

DSP, Disease Specific Programme™.

**Supplementary Figure 2. MGFA class and number of prescribed maintenance treatments (N=456)**

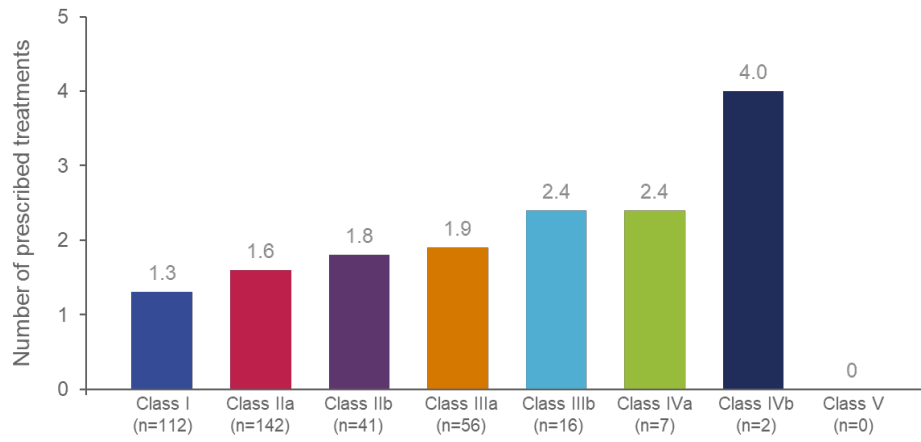

MGFA, Myasthenia Gravis Foundation of America.
